# Supplementary material for: Flexoelectric behavior of bimesogenic liquid crystals in the nematic phase – observation of a new self-assembly pattern at the twist-bend nematic and the nematic interface
Source: Royal Society of Chemistry journal article supplement (doi:10.1039/c4tc01043d), 2014-01-01
Supplement: c4tc01043d1.pdf [file c4tc01043d1.pdf]

## Supplementary Information

### Flexoelectric behavior of bimesogenic liquid crystals in the nematic phase observation of a new self-assembly pattern at the twist-bend nematic and nematic interface.

R. Balachandran,<sup>1</sup> V. P. Panov,<sup>1</sup> Yu. P. Panarin,<sup>1,2</sup> J. K. Vij,<sup>1</sup> M. G. Tamba,<sup>3</sup> G. H. Mehl,<sup>3</sup>  
and J. K. Song<sup>4</sup>

1)Department of Electronic and Electrical Engineering, Trinity College, University of  
Dublin, Dublin 2, Ireland

2)School of Electronic and Communication Engineering, DIT, Dublin 8, Ireland

3)Department of Chemistry, University of Hull, HU6 7RX, UK

4)School of Electronic and Electrical Engineering, SKKU, Suwon, Korea

#### 1. Additional Texture Images

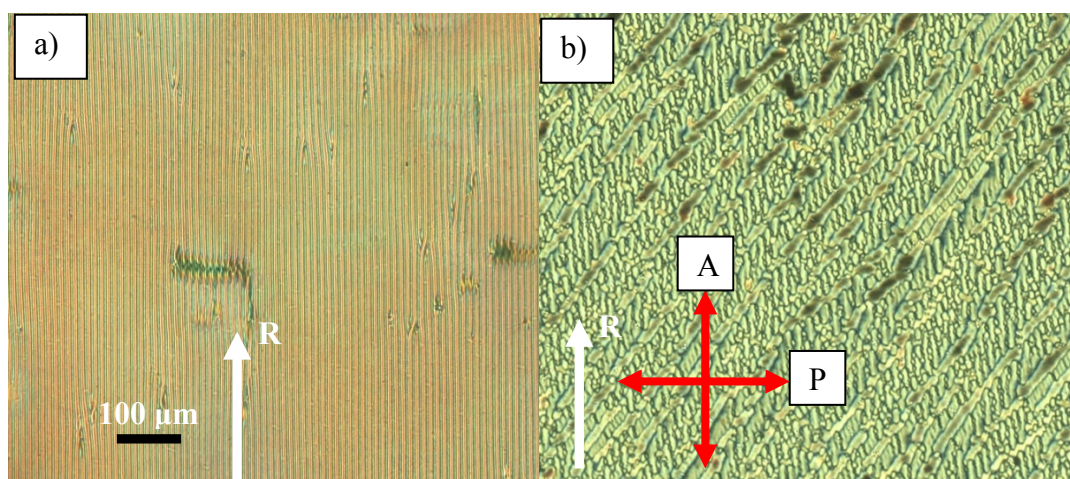

Figure ESI1: Textures obtained in the  $N_{tb}$  phase of CBC11CB in a planar aligned cell under crossed polarizers of a polarizing optical microscope (a) in the absence of chiral additive, length of black bar is  $100\mu\text{m}$ , white arrow depicts rubbing direction (R); (b) presence of 3% chiral agent R5011. Addition of the chiral agent dramatically affects the properties of the  $N_{tb}$  phase as seen from the non-uniform rope-like textures presented in Fig. ESI1(b). This is a topic for further investigations. The domains of opposite chirality [S1] are best studied in materials with negative  $\Delta\epsilon'$ , since in materials with  $\Delta\epsilon' > 0$  the achievable contrast between the domains is limited by the freedericksz transition occurring at higher applied voltages.

## 2. Additional Figure

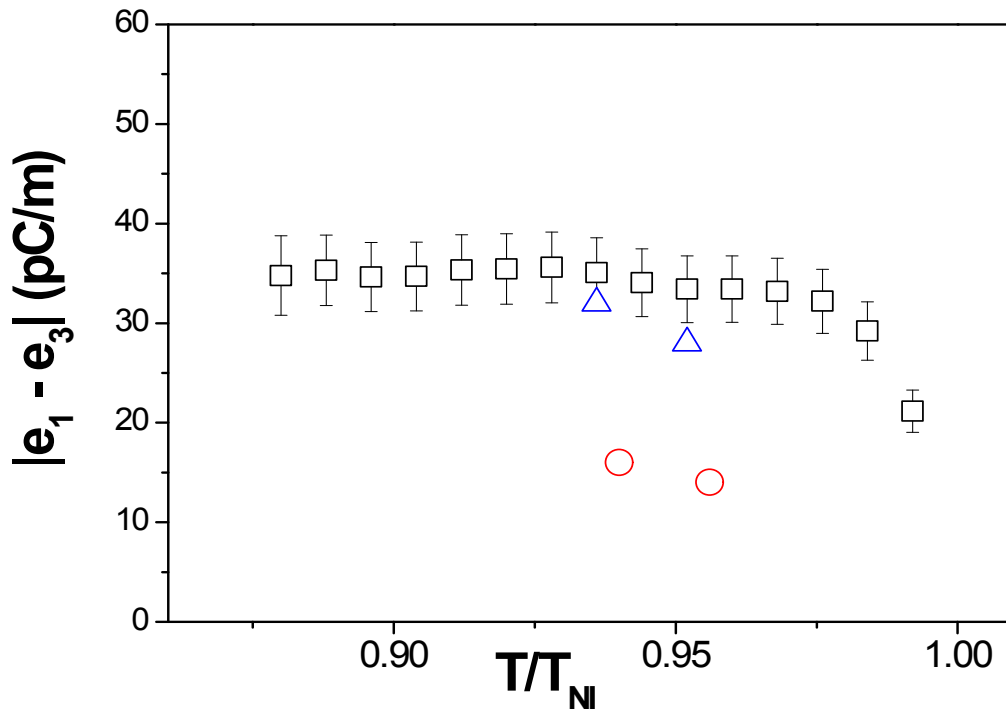

Figure ES12: The effective flexoelectric coefficient as a function of reduced temperature plotted for CBC11CB (black-open Squares). For comparison we have included the approximate values of  $|e_1 - e_3|$  for the bimesogens FFO9OCB taken from Atkinson *et. al.*, Phys. Rev. E, 2012, **85**, 012701 [S2] (open blue triangles) and F3FE9ECB taken from Atkinson *et. al.*, Phys. Chem. Chem. Phys., 2012, **14**, 16377 [S3] (open red circles) for a few temperature points. Please note that the authors use  $(e_s + e_b)$  notation in refs. [S2] and [S3] which is equivalent to  $|e_1 - e_3|$  in our notation.

## References

- [S1] V. P. Panov, R. Balachandran, M. Nagaraj, J. K. Vij, M. G. Tamba, A. Kohlmeier, and G. H. Mehl, *Appl. Phys. Lett.*, 2011, 99, 261903.
- [S2] K. L. Atkinson, S. M. Morris, F. Castles, M. M. Qasim, D. J. Gardiner, and H. J. Coles, Phys. Rev. E, 2012, **85**, 012701.
- [S3] K. L. Atkinson, S. M. Morris, M. M. Qasim, F. Castles, D. J. Gardiner, P. J. W. Hands, S. S. Choi, W.-S Kim and H. J. Coles, Phys. Chem. Chem. Phys., 2012, **14**, 16377.
